# Supplementary material
Source: PubMed Central journal article supplement (PMC5344639)
Supplement: supp_the2016-0274_onco12035-sup-0001-suppinfo1.pdf [file supp_the2016-0274_onco12035-sup-0001-suppinfo1.pdf]

Supplemental Tables for:  
Population Level Differences in Rectal Cancer Survival in Uninsured Patients Are Partially Explained by Differences in Treatment

Dianne Pulte et al.

**Table S1:** Age-specific and age-standardized 1- to 3-year survival by insurance type.

| Age   | Time (Years) | Insurance type      |                     |                     |                     | Diff1 <sup>1**</sup> | Diff2 <sup>2**</sup> |
|-------|--------------|---------------------|---------------------|---------------------|---------------------|----------------------|----------------------|
|       |              | All                 | Medicaid            | None                | Other               |                      |                      |
| All*  | 1            | 90.8<br>(90.5-91.2) | 81.4<br>(80.2-82.6) | 83.6<br>(81.9-85.2) | 92.9<br>(92.6-93.3) | +11.5                | +9.3                 |
|       | 2            | 82.9<br>(82.4-83.3) | 67.4<br>(65.8-69.0) | 71.2<br>(69.0-73.4) | 86.3<br>(85.8-86.8) | +18.9                | +15.1                |
|       | 3            | 76.7<br>(76.2-77.3) | 58.5<br>(56.7-60.3) | 61.9<br>(59.4-64.5) | 80.7<br>(80.1-81.3) | +22.2                | +18.8                |
| 15-44 | 1            | 92.5<br>(91.7-93.3) | 85.3<br>(82.6-87.9) | 89.3<br>(85.8-92.8) | 94.2<br>(93.4-95.0) | +8.9                 | +4.9                 |
| 45-54 |              | 92.8<br>(92.4-93.3) | 83.6<br>(81.7-85.5) | 85.0<br>(82.4-87.6) | 94.7<br>(94.3-95.2) | +11.1                | +9.7                 |
| 55-64 |              | 89.3<br>(88.8-89.8) | 79.1<br>(77.3-80.9) | 81.2<br>(78.7-83.6) | 91.6<br>(91.1-92.1) | +12.5                | +10.4                |
| 15-44 | 2            | 83.7<br>(82.5-84.9) | 67.3<br>(63.5-71.1) | 73.7<br>(68.2-79.2) | 87.7<br>(86.5-89.0) | +20.4                | +14.0                |
| 45-54 |              | 85.5<br>(84.8-86.1) | 70.1<br>(67.6-72.6) | 75.2<br>(71.8-78.5) | 88.4<br>(87.7-89.1) | +18.3                | +13.2                |
| 55-64 |              | 81.2<br>(80.6-81.9) | 66.0<br>(63.7-68.3) | 68.4<br>(65.2-71.5) | 84.8<br>(84.1-85.5) | +18.8                | +16.4                |
| 15-44 | 3            | 77.3<br>(75.9-78.7) | 59.7<br>(55.5-63.9) | 64.5<br>(58.0-71.0) | 81.6<br>(80.0-83.1) | +21.9                | +17.1                |
| 45-54 |              | 79.6<br>(78.7-80.4) | 60.1<br>(57.2-63.0) | 64.6<br>(60.4-68.7) | 83.3<br>(82.4-84.1) | +23.2                | +18.7                |
| 55-64 |              | 75.1<br>(74.3-75.9) | 57.3<br>(54.7-59.9) | 59.8<br>(56.2-63.4) | 79.1<br>(78.3-79.9) | +21.8                | +19.3                |

<sup>1</sup> Diff1=difference between Medicaid and other insurance (% units)

<sup>2</sup> Diff2=difference between uninsured and other insurance (% units)

\*Age adjusted

\*\*p<0.001 for comparison

Supplemental Tables for:  
Population Level Differences in Rectal Cancer Survival in Uninsured Patients Are Partially Explained by Differences in Treatment

Dianne Pulte et al.

**Table S2:** Age-standardized 1- to 3-year survival by stage and insurance type

| Stage | Time (Years) | Insurance type      |                     |                     |                     | Diff1   | Diff2   |
|-------|--------------|---------------------|---------------------|---------------------|---------------------|---------|---------|
|       |              | All                 | Medicaid            | None                | Other               |         |         |
| I     | 1            | 96.6<br>(96.1-97.0) | 89.5<br>(86.9-92.0) | 94.7<br>(92.2-97.2) | 97.4<br>(97.0-97.8) | +7.9**  | +2.7*   |
|       | 2            | 94.2<br>(93.6-94.8) | 84.0<br>(80.8-87.3) | 89.8<br>(86.1-93.5) | 95.6<br>(95.0-96.2) | +11.6** | +5.8**  |
|       | 3            | 91.9<br>(91.1-92.6) | 79.1<br>(75.2-83.0) | 86.5<br>(82.0-90.9) | 93.6<br>(92.8-94.3) | +14.5** | +7.1**  |
| II    | 1            | 95.7<br>(95.2-96.3) | 92.0<br>(90.0-94.0) | 94.7<br>(92.5-97.0) | 96.6<br>(96.0-97.2) | +4.6**  | +1.9*   |
|       | 2            | 90.2<br>(89.4-91.1) | 81.4<br>(78.2-84.5) | 85.3<br>(81.2-89.3) | 92.5<br>(91.6-93.4) | +9.1**  | +7.2**  |
|       | 3            | 86.0<br>(84.9-87.1) | 73.8<br>(70.0-77.5) | 77.0<br>(71.8-82.2) | 89.0<br>(87.9-90.2) | +14.2** | +12.0** |
| III   | 1            | 95.3<br>(94.9-95.8) | 90.1<br>(88.2-92.1) | 92.4<br>(90.0-94.9) | 96.3<br>(95.8-96.8) | +6.2**  | +3.9**  |
|       | 2            | 88.3<br>(87.5-89.1) | 77.6<br>(74.6-80.5) | 83.6<br>(79.9-87.4) | 90.5<br>(89.7-91.3) | +12.9** | +6.9**  |
|       | 3            | 81.8<br>(80.8-82.8) | 67.8<br>(64.2-71.3) | 72.2<br>(67.2-77.2) | 84.7<br>(83.7-85.8) | +13.9** | +12.5** |
| IV    | 1            | 68.2<br>(66.9-69.4) | 59.2<br>(56.3-62.2) | 59.0<br>(54.8-63.2) | 72.5<br>(71.0-73.9) | +13.3** | +13.5** |
|       | 2            | 46.0<br>(44.5-47.4) | 34.8<br>(31.7-37.8) | 35.8<br>(31.3-40.3) | 51.1<br>(49.4-52.8) | +16.3** | +15.3** |
|       | 3            | 30.2<br>(28.8-31.7) | 22.1<br>(19.1-25.0) | 21.6<br>(17.2-26.0) | 34.2<br>(32.4-36.0) | +12.1** | +12.6** |

<sup>1</sup> Diff1=difference between Medicaid and other insurance (% units)

<sup>2</sup> Diff2=difference between uninsured and other insurance (% units)

\*p<0.05 for comparison

\*\*p<0.001 for comparison
